# **New genes involved in Angelman syndrome-like: expanding the genetic spectrum**

Cinthia Aguilera<sup>1</sup>, Elisabeth Gabau<sup>2</sup>, Ariadna Ramirez-Mallafré<sup>2</sup>, Carme Brun-Gasca<sup>2,3</sup>,  
Jana Dominguez-Carral<sup>2</sup>, Veronica Delgadillo<sup>2</sup>, Steve Laurie<sup>4</sup>, Sophia Derdak<sup>4</sup>, Natàlia  
Padilla<sup>5</sup>, Xavier de la Cruz<sup>5,6</sup>, Núria Capdevila<sup>2</sup>, Nino Spataro<sup>1</sup>, Neus Baena<sup>1</sup>, Miriam  
Guitart<sup>1\*</sup> and Anna Ruiz<sup>1\*</sup>

<sup>1</sup>Genetics Laboratory, UDIAT-Centre Diagnòstic. Parc Taulí Hospital Universitari.

Institut d'Investigació i Innovació Parc Taulí I3PT. Universitat Autònoma de Barcelona.

Sabadell, Spain.

<sup>2</sup>Paediatric Unit. Parc Taulí Hospital Universitari. Institut d'Investigació i Innovació Parc

Taulí I3PT. Universitat Autònoma de Barcelona. Sabadell, Spain.

<sup>3</sup>Department of Clinical Psychology and Health Psychology, Universitat Autònoma de

Barcelona, 08193 Bellaterra, Barcelona, Spain.

<sup>4</sup>CNAG-CRG, Centre for Genomic Regulation (CRG), The Barcelona Institute of Science

and Technology, Baldori Reixac 4, Barcelona 08028, Spain.

<sup>5</sup>Neurosciences Area, Vall d'Hebron Institute of Research (VHIR). Universitat Autònoma

de Barcelona. Barcelona, Spain.

<sup>6</sup>Institució Catalana de Recerca i Estudis Avançats (ICREA), Barcelona, Spain.

\*Corresponding authors:

Dr Anna Ruiz, e-mail: [aruizn@tauli.cat](mailto:aruizn@tauli.cat), Dr Miriam Guitart, e-mail: [mguitart@tauli.cat](mailto:mguitart@tauli.cat)

## 24 **Abstract**

25 Angelman syndrome (AS) is a neurogenetic disorder characterized by severe  
26 developmental delay with absence of speech, happy disposition, frequent laughter,  
27 hyperactivity, stereotypies, ataxia and seizures with specific EEG abnormalities. There is  
28 a 10-15% of patients with an AS phenotype whose genetic cause remains unknown  
29 (Angelman-like syndrome, AS-like). Whole-exome sequencing (WES) was performed on  
30 a cohort of 14 patients with clinical features of AS and no molecular diagnosis. As a result,  
31 we identified 10 *de novo* and 1 X-linked pathogenic/likely pathogenic variants in 10  
32 neurodevelopmental genes (*SYNGAP1*, *VAMP2*, *TBL1XR1*, *ASXL3*, *SATB2*, *SMARCE1*,  
33 *SPTAN1*, *KCNQ3*, *SLC6A1* and *LAS1L*) and one deleterious *de novo* variant in a candidate  
34 gene (*HSF2*). Our results highlight the wide genetic heterogeneity in AS-like patients and  
35 expands the differential diagnosis. New AS-like genes do not interact directly with  
36 *UBE3A* gene product but are involved in synapsis and neuron system development.

37

## 38 **INTRODUCTION**

39 Angelman syndrome (AS, OMIM #105830) is a neurogenetic disorder with a  
40 prevalence of about 1/15000 births. AS is characterized by severe developmental  
41 delay/intellectual disability (DD/ID) with absence of speech and distinctive dysmorphic  
42 craniofacial features such as microcephaly and wide mouth. Neurological problems  
43 include ataxia and seizures with specific EEG abnormalities. The behavioral phenotype  
44 is characterized by happy disposition, frequent laughter, hyperactivity and stereotypies  
45 [1]. The consensus criteria for the clinical diagnosis of AS was proposed in 2005 by

46 Williams et al.,[1] which included a list of (i) consistent, (ii) frequent and (iii) associated  
47 features. However, clinical manifestations of AS can overlap with other diseases.

48 AS is caused by the loss of function in neuronal cells of the ubiquitin protein ligase  
49 E6-AP (E6-Associated Protein) encoded by the *UBE3A* gene, which is located on  
50 chromosome 15q11-q13 imprinted region. Methylation study of this region identifies  
51 75–80% of AS patients including maternal deletion, paternal uniparental disomy (UPD)  
52 and imprinting center defects. Pathogenic or likely pathogenic variants in the *UBE3A*  
53 gene identify a further 10% of cases. However, for approximately 10-15% of clinically  
54 diagnosed AS patients, the genetic cause remains unknown (AS-like)[2].

55 Some of these AS-like patients present alternative clinical and molecular  
56 diagnoses in syndromes that have overlapping clinical phenotypes and that should be  
57 considered in the differential diagnosis of AS. AS differential diagnosis include single  
58 gene disorders such as Christianson syndrome (*SLC9A6*), Rett syndrome (*MECP2*), Pitt  
59 Hopkins syndrome (*TCF4*), Kleefstra syndrome (*EHMT1*) and Mowat-Wilson syndrome  
60 (*ZEB2*). Individuals affected by the above mentioned syndromes present severe DD,  
61 seizures, postnatal microcephaly, absent or minimal speech and sleep disturbances as  
62 AS patients [3,4].

63 In order to further identify the molecular defects in AS-like patients, whole  
64 exome sequencing (WES) was performed in a cohort of 13 parent-patient trios and one  
65 single patient with clinical features of AS and no molecular diagnosis. Pathogenic/likely  
66 pathogenic variants in known neurodevelopmental genes were found in 78,5% of  
67 patients while a deleterious variant in a new candidate gene was identified in another  
68 patient. Overall, our results show that 10-15% of patients with a clinical but with no

69 molecular diagnosis of AS present alternative genetic alterations in genes not previously  
70 associated to AS, expanding its genetic spectrum.

71

## 72 **MATERIALS AND METHODS**

### 73 **Patient samples and clinical description of the cohort**

74 14 patients (7 girls and 7 boys) from the Parc Taulí Hospital Universitari (Sabadell,  
75 Spain) who met the consistent clinical features of AS [1] and lacked a molecular diagnosis  
76 of AS were selected. Patient 1 had also been included in another study [5]. The  
77 corresponding informed consent was obtained from all parents for each participant in  
78 the study.

79 Clinical characteristics of the enrolled patients are available in Table 1. Consistent  
80 features were present in 100% of patients except for the ataxia of gait which was present  
81 in 9 of 14 patients. Even though the ataxia of gait is considered a consistent feature in  
82 AS patients a recent review shows that it ranges from 72,7% to 100 % depending on the  
83 genetic etiology [6]. All the cases were sporadic and no other relevant findings were  
84 present in their family history.

85  
86  
87  
88  
89  
90  
91  
92  
93  
94  
95  
96  
97  
98  
99  
100  
101  
102  
103  
104  
105  
106  
107  
108  
109  
110  
111  
112

**Table 1.** Clinical characteristics of AS-like patients.

| Patient | Gender | Age at clinical diagnosis (years) | Age at molecular diagnosis (years) | Consistent features present in 100% of patients with AS |                        |                         |                                       | Frequent features present in more than 80% of AS affected individuals |          |              | Associated features present in 20-80% of AS affected individuals |
|---------|--------|-----------------------------------|------------------------------------|---------------------------------------------------------|------------------------|-------------------------|---------------------------------------|-----------------------------------------------------------------------|----------|--------------|------------------------------------------------------------------|
|         |        |                                   |                                    | Severe developmental delay                              | Speech impairment      | Ataxia or unsteady gait | Apparent happy demeanor/ Stereotypies | Microcephaly                                                          | Seizures | Abnormal EEG |                                                                  |
| 1       | M      | 1                                 | 14                                 | +                                                       | + (5-10 words)         | +                       | +/+                                   | -                                                                     | +        | +            | Sleep disorder, hypotonia                                        |
| 2       | F      | 8                                 | 19                                 | +                                                       | + (less than 5 words)  | -                       | +/+                                   | -                                                                     | +        | +            | Sleep disorder, feeding problems, kyphoscoliosis                 |
| 3       | F      | 1                                 | 12                                 | +                                                       | + (Absent speech)      | +                       | -/+                                   | -                                                                     | +        | +            | Hypotonia                                                        |
| 4       | F      | 11 months                         | 9                                  | +                                                       | + (Absent speech)      | +                       | +/+                                   | + (Relative)                                                          | -        | +            | Hypotonia, feeding problems                                      |
| 5       | F      | 19 months                         | 20                                 | +                                                       | + (5-10 words)         | +                       | +/-                                   | -                                                                     | -        | +            | -                                                                |
| 6       | F      | 4                                 | 18                                 | +                                                       | + (Absent speech)      | -                       | +/-                                   | + (Relative)                                                          | +        | NA           | Scoliosis                                                        |
| 7       | M      | 5                                 | 15                                 | +                                                       | + (less than 5 words)  | +                       | +/+                                   | -                                                                     | +        | +            | Feeding problems, wide mouth, hypotonia                          |
| 8       | F      | 1                                 | 14                                 | +                                                       | + (More than 20 words) | +                       | +/-                                   | +                                                                     | -        | -            | Hypotonia                                                        |
| 9       | M      | 8                                 | 38                                 | +                                                       | + (Absent speech)      | +                       | +/+                                   | + (Relative)                                                          | +        | +            | Hypotonia, feeding problems (oesophageal reflux), sleep disorder |
| 10      | M      | 1                                 | 7                                  | +                                                       | + (less than 5 words)  | -                       | +/-                                   | + (Relative)                                                          | -        | -            | Wide spaced teeth, brachycephaly                                 |
| 11      | F      | 2                                 | 14                                 | +                                                       | + (less than 5 words)  | -                       | +/+                                   | + (Relative)                                                          | +        | NA           | Feeding problems (dysphagia)                                     |
| 12      | M      | 3                                 | 24                                 | +                                                       | + (5-10 words)         | -                       | +/+                                   | +                                                                     | +        | NA           | Strabismus, sleep disorder, kyphoscoliosis                       |
| 13      | M      | 3                                 | 9                                  | +                                                       | + (Absent speech)      | +                       | +/+                                   | + (Relative)                                                          | +        | -            | Sleep disorder, hypotonia                                        |
| 14      | M      | 2                                 | 13                                 | +                                                       | + (Absent speech)      | +                       | +/+                                   | -                                                                     | +        | +            | Sleep disorder, wide-spaced teeth                                |

M, Male; F, Female; +, present; -, not present; NA, non-available data.

## 113 **Whole-exome sequencing and variant interpretation**

114 Trio WES of 13 patients and their parents was performed using the SureSelect  
115 Human All Exon V5+UTR kit (Agilent technologies). In patient 4, WES was performed only  
116 in the patient sample. Variant discovery was performed following the GATK best  
117 practices [7]. All exome variants were first checked against a *de novo* followed by an X-  
118 linked and autosomal recessive model of inheritance. The impact of missense and splice  
119 site variants was assessed using several *in silico* tools (S1 Table). Variants were classified  
120 following the ACMG guidelines [8]. Pathogenic and likely pathogenic variants have been  
121 submitted to ClinVar.

122

## 123 **Real time quantitative PCR (RTqPCR) analysis**

124 RNA was extracted using the Biostic Blood Total RNA Isolation Kit sample (MO  
125 BIO laboratories, Inc) and cDNA was obtained using the PrimeScript<sup>TM</sup>MRT reagent Kit  
126 (Takara). RTqPCR gene expression analysis was performed using the Taqman probes  
127 HSF2-Hs00988309\_g1 and GADPH-Hs02758991\_g1 for normalization (Applied  
128 Biosystems).

129

## 130 **Network and pathway enrichment analysis in AS-like genes**

131 Leveraging the STRING database [9], a network analysis was performed in order  
132 to examine if the new identified AS-like genes interact among themselves, with the  
133 known AS-like genes [3] or with the *UBE3A* gene. Network analysis was carried out  
134 without taking into account the text mining interaction option and using a minimum  
135 required interaction score of 0.7 (high confidence) (S1 Fig).

## 136 Results

137 Identified variants were first filtered according to a dominant *de novo* model of  
138 inheritance. Variants in genes known to be involved in neurodevelopmental diseases  
139 were selected and confirmed to be *de novo*. Overall, 10 *de novo* (*SYNGAP1*, *VAMP2*,  
140 *TBL1XR1*, *ASXL3*, *SATB2*, *SMARCE1*, *SPTAN1*, *KCNQ3* and *SLC6A1*) and 1 X-linked (*LAS1L*)  
141 protein altering variants were confirmed in 11 patients, leading to a diagnostic yield of  
142 78,5%. These variants were located in 10 different genes previously reported to be  
143 associated with neurodevelopmental disorders [5,10–17].

144 Pathogenic and likely pathogenic variants identified in this study are summarized  
145 in Table 2. Most of the genes identified in our cohort are involved in synapsis (*VAMP2*,  
146 *SYNGAP1*, *SLC6A1* and *KCNQ3*) and chromatin remodeling or transcription regulation  
147 (*TBL1XR1*, *SATB2*, *SMARCE1*, *ASXL3* and *LAS1L*) as has been described before in  
148 neurodevelopmental diseases [18,19].

149 Additional clinical features of patients were analyzed taking into account the  
150 clinical phenotype described for the genes identified. The presence of specific clinical  
151 features associated to the new genes were confirmed for some of the patients. In short,  
152 cerebellar atrophy in *SPTAN1* [10], hypoplasia of the corpus callosum, hypoplasia of the  
153 5<sup>th</sup> finger nail, hypertrichosis, sparse scalp hair and aggressive behavior in *SMARCE1* [20],  
154 truncal obesity and short stature in *LAS1L* [13], myoclonic atonic seizures in *SLC6A1* [12],  
155 aggressive behavior in *SYNGAP1* [14], dysmorphic features and dental anomalies in  
156 *ASXL3* [11] and aggressive behavior and dental anomalies in *SATB2* [16] (Fig 1).

**Table 2.** Pathogenic and likely pathogenic variants identified in AS-like patients.

| Patient | Gene    | NM number                    | Nucleotide change    | Amino acid change    | Variant Type | Pattern of inheritance | Varsome Classification | Described before                                                 | Protein function                                                                                                              |
|---------|---------|------------------------------|----------------------|----------------------|--------------|------------------------|------------------------|------------------------------------------------------------------|-------------------------------------------------------------------------------------------------------------------------------|
| 1       | VAMP2   | NM_014232.2                  | c.128_130delTGG      | p.Val43del           | In-frame     | <i>De novo</i>         | Pathogenic             | Yes<br>Salprietto et al., 2019                                   | VAMP2 is a member of the SNARE family of proteins, which are involved in membrane fusion of synaptic vesicles.                |
| 2       | SYNGAP1 | NM_006772.2                  | c.1861C>T            | p.Arg621*            | Nonsense     | <i>De novo</i>         | Pathogenic             | No                                                               | SYNGAP1 is a RAS-GTPase-activating protein with a critical role in synaptic development, structure, function and plasticity.  |
| 3       | TBL1XR1 | NM_024665.5                  | c.1000T>C            | p.Cys334Arg          | Missense     | <i>De novo</i>         | Likely pathogenic      | No                                                               | TBL1XR1 is part of the repressive NCoR/SMRT complex acting as a transcriptional regulator.                                    |
| 4       | TBL1XR1 | NM_024665.5                  | c.1043A>G            | p.His348Arg          | Missense     | <i>De novo</i>         | Likely pathogenic      | No                                                               |                                                                                                                               |
| 5       | SATB2   | NM_001172509.1               | c.1826delA           | p.Asp609Alafs*15     | Frameshift   | <i>De novo</i>         | Pathogenic             | No                                                               | SATB2 participates in chromatin remodeling and transcription regulation.                                                      |
| 6       | KCNQ3   | NM_004519.3                  | c.688C>T             | p.Arg230Cys          | Missense     | <i>De novo</i>         | Pathogenic             | Yes<br>Decipher and Miceli F et al., 2015, Sands TT et al., 2019 | KCNQ3 is a voltage-gated potassium channel subunits that underlay the neuronal M-Current.                                     |
| 7       | SMARCE1 | NG_032163.1<br>(NM_003079.4) | c.237+1G>T           | p.Ala53_Lys79del     | Splice site  | <i>De novo</i>         | Likely pathogenic      | No                                                               | SMARCE1 is part of the SWI/SNF chromatin remodeling complex involved in transcriptional activation.                           |
| 8       | SPTAN1  | NM_001130438.2               | c.6592_6597dupCTGCAG | p.Leu2198_Gln2199dup | In-frame     | <i>De novo</i>         | Likely pathogenic      | No                                                               | SPTAN1 is an $\alpha$ -II spectrin involved in stabilization and activation of membrane channels, transporters and receptors. |
| 9       | ASXL3   | NM_030632.2                  | c.3106C>T            | p.Arg1036*           | Nonsense     | <i>De novo</i>         | Pathogenic             | Yes<br>Kuechler A et al., 2016                                   | ASXL3 plays a role in the regulation of gene transcription and histone deubiquitination.                                      |
| 10      | LAS1L   | NM_031206.4                  | c.1237G>A            | p.Gly413Arg          | Missense     | X-linked               | Likely pathogenic      | No                                                               | LAS1L is involved in the 60S ribosomal subunit synthesis, maturation of 28S rRNA and regulation of transcription.             |
| 14      | SLC6A1  | NM_003042.3                  | c.889G>A             | p.Gly297Arg          | Missense     | <i>De novo</i>         | Pathogenic             | Yes<br>Carvill GL et al., 2015                                   | SLC6A1 gene encodes for the GAT-1 GABA transporter.                                                                           |



160 **Fig 1. Schematic representation of the phenotypic overlap between the patients with**  
161 **pathogenic/likely pathogenic variants genes and the AS phenotype.** In the middle of  
162 the figure there are the core features of AS that show all the patients, while in the tips  
163 there are the clinical features present in the patients of our cohort and that are  
164 associated with the gene identified.

165

166 However, not all patients presented all the clinical features associated with the genes  
167 identified. Indeed, unsteady gait and hypotonia were not present in patient carrying the  
168 pathogenic variant in *SYNGAP1* [14]; similarly the patient harboring a pathogenic variant  
169 in *SATB2* did not show sialorrhea and feeding difficulties [16]. Finally, the ataxia of gait,  
170 stereotypies and hypotonia were not observed for the patient with a pathogenic variant  
171 in *KCNQ3* [17].

172 A novel candidate variant was identified in a gene not previously associated with  
173 neurodevelopmental disorders. The identified variant is a *de novo* frameshift deletion  
174 c.456\_459delTGAG (NM\_004506.3), p.(Ser152Argfs\*40) in *HSF2* gene. The variant has  
175 not been reported before and is not present in the gnomAD database. Quantification of  
176 mRNA transcripts showed a reduction in the allele carrying the frameshift variant  
177 suggesting the activation of the nonsense-mediated mRNA decay (NMD) machinery  
178 [21], supporting a loss of function mechanism of disease for the *HSF2* gene (S2 Fig).

179 To assess whether the genes identified in our study are functionally related to  
180 previously known AS-like genes or *UBE3A*, we tested their connectivity in the human  
181 protein-protein interaction network. No direct protein interactions were detected  
182 between the genes identified in our study, the known AS-like genes nor *UBE3A*.

183 However, a significant enrichment in GO terms related to the nervous system  
184 development (biological process), protein N-terminus binding (molecular function) and  
185 nuclear lumen (cellular component) were observed. Overall, these results suggest that  
186 the genes found in our cohort, the *UBE3A* gene and the known AS-like genes may not  
187 interact directly but carry out biological functions involved in synapsis and brain  
188 development, leading to overlapping phenotypes (S1 Fig).

189

## 190 **DISCUSSION**

191 We identified causal variants in 11 out of 14 patients with an AS-like phenotype.  
192 The global yield diagnostic of WES in this study is 78,5%, which is higher to what has  
193 been reported in the literature for other neurodevelopmental disorders (24-68%) [22].  
194 The results of WES led to the identification of 10 new genes to cause an AS-like  
195 phenotype (*SYNGAP1*, *VAMP2*, *TBL1XR1*, *ASXL3*, *SATB2*, *SMARCE1*, *SPTAN1*, *KCNQ3*,  
196 *SLC6A1* and *LAS1L*), all of them previously associated with other neurodevelopmental  
197 disorders. In addition, we propose *HSF2* (Heat Shock Factor) as a new candidate gene  
198 for the AS-like phenotype. Although *HSF2* has not been previously associated with any  
199 human disease, the gene is highly expressed in the brain and highly intolerant to loss of  
200 function variation (pLI 0.92). *HSF2* knockout mice show defects in spermatogenesis and  
201 in the development of the central nervous system [23,24]. The identification of  
202 additional patients with loss of function variants in *HSF2* and functional studies in neural  
203 cells will contribute to elucidate the role of *HSF2* in the AS-like phenotype.

204 *De novo* variants have been described to account for approximately half of the  
205 genetic architecture of severe developmental disorders [25]. In our cohort, 10 of the 11

206 pathogenic and likely pathogenic variants were *de novo*, accounting for 90% of diagnosis  
207 and highlighting the power of using trio-WES for the molecular diagnosis of severe  
208 developmental disorders. Only in one case, the X-linked variant in *LAS1L* was inherited  
209 from the mother, who was a healthy mosaic carrier (20%).

210 All patients had received an initial diagnosis of AS, supported by the presence of  
211 consistent and frequent clinical features. In the majority of our patients (11/14) the  
212 initial diagnosis was done during infancy or early childhood (before five years old). At  
213 the time of initial diagnosis, all of them presented severe global DD and speech  
214 impairment in addition to ataxia of gait or the characteristic happy disposition. The  
215 review of patient's clinical reports upon WES results showed the presence of additional  
216 clinical features generally not described for AS, but that were then associated with the  
217 new identified genes. Pathogenic/likely pathogenic variants in *SMARCE1*, *SATB2*,  
218 *SYNGAP1*, *SLC6A1*, *ASXL3*, *SPTAN1* and *LAS1L* genes are associated with  
219 neurodevelopment disorders that overlap with AS and with some differential features  
220 that were present in our patients (Fig 1). On the other hand, *VAMP2*, *KCNQ3* and  
221 *TBL1XR1* genes are associated with ID, autism spectrum disorder and epilepsy [5,15,17],  
222 features that are shared by AS-like patients.

223 Lack of molecular diagnosis in 10-15% of clinically diagnosed AS patients has  
224 been used to define the AS-like group. Our results indicate that the 78,5% of AS-like  
225 patients are carriers of pathogenic variants in genes involved in neurodevelopmental  
226 disorders whose features overlap with AS, showing the wide genetic heterogeneity in  
227 AS-like (Fig 1). AS-like new genes do not interact directly with *UBE3A* gene product but  
228 are involved in synapsis and nervous system development. Except for the *SYNGAP1*  
229 gene, none of the genes identified here have been previously described in the

230 differential diagnosis of AS [26]. We propose the genes identified in this study should be  
231 included in the AS differential diagnosis and that trio WES should be considered as first  
232 line approach for the molecular diagnosis of AS-like patients. A high rate of diagnosis in  
233 patients with AS-like is essential, contributing to more appropriate clinical patient  
234 surveillance as well as allowing family genetic counseling.

235

## 236 **Acknowledgements**

237 We thank the patients and families for their participation in this study.

238

## 239 **References**

- 240 1. Williams C, Beaudet AL, Clayton-Smith J, Knoll JH, Kyllerman M, Laan LA, et al.  
241 Angelman Syndrome 2005: Updated Consensus for Diagnostic Criteria Charles.  
242 Am J Med Genet Part A. 2006;140: 413–418. doi:10.1002/ajmg.a
- 243 2. Beygo J, Buiting K, Ramsden SC, Ellis R, Clayton-Smith J, Kanber D. Update of the  
244 EMQN/ACGS best practice guidelines for molecular analysis of Prader-Willi and  
245 Angelman syndromes. Eur J Hum Genet. 2019;27: 1326–1340.  
246 doi:10.1038/s41431-019-0435-0
- 247 3. Tan WH, Bird LM, Thibert RL, Williams CA. If not Angelman, what is it? A review  
248 of Angelman-like syndromes. Am J Med Genet Part A. 2014;164: 975–992.  
249 doi:10.1002/ajmg.a.36416
- 250 4. Luk H-M. Angelman-Like Syndrome: A Genetic Approach to Diagnosis with  
251 Illustrative Cases. Case Rep Genet. 2016;2016: 1–6. doi:10.1155/2016/9790169
- 252 5. Salpietro V, Malintan NT, Llano-Rivas I, Spaeth CG, Efthymiou S, Striano P, et al.

- 253 Mutations in the Neuronal Vesicular SNARE VAMP2 Affect Synaptic Membrane  
254 Fusion and Impair Human Neurodevelopment. *Am J Hum Genet.* 2019;104: 721–  
255 730. doi:10.1016/j.ajhg.2019.02.016
- 256 6. Bell L, Wittkowski A, Hare DJ. Movement Disorders and Syndromic Autism: A  
257 Systematic Review. *J Autism Dev Disord.* 2019;49: 54–67. doi:10.1007/s10803-  
258 018-3658-y
- 259 7. Van der Auwera GA, Carneiro MO, Hartl C, Poplin R, Del Angel G, Levy-  
260 Moonshine A, et al. From FastQ data to high confidence variant calls: the  
261 Genome Analysis Toolkit best practices pipeline. *Curr Protoc Bioinforma.*  
262 2013;43: 11.10.1-33. doi:10.1002/0471250953.bi1110s43
- 263 8. Richards S, Aziz N, Bale S, Bick D, Das S, Gastier-Foster J, et al. Standards and  
264 guidelines for the interpretation of sequence variants: a joint consensus  
265 recommendation of the American College of Medical Genetics and Genomics  
266 and the Association for Molecular Pathology. *Genet Med.* 2015;17: 405–423.  
267 doi:10.1038/gim.2015.30
- 268 9. Szklarczyk D, Morris JH, Cook H, Kuhn M, Wyder S, Simonovic M, et al. The  
269 STRING database in 2017: Quality-controlled protein-protein association  
270 networks, made broadly accessible. *Nucleic Acids Res.* 2017;45: D362–D368.  
271 doi:10.1093/nar/gkw937
- 272 10. Syrbe S, Harms FL, Parrini E, Montomoli M, Mutze U, Helbig KL, et al. Delineating  
273 SPTAN1 associated phenotypes: from isolated epilepsy to encephalopathy with  
274 progressive brain atrophy. *Brain.* 2017;140: 2322–2336.  
275 doi:10.1093/brain/awx195
- 276 11. Balasubramanian M, Willoughby J, Fry AE, Weber A, Firth H V, Deshpande C, et

- 277 al. Delineating the phenotypic spectrum of Bainbridge-Ropers syndrome: 12  
278 new patients with de novo , heterozygous, loss-of-function mutations in ASXL3  
279 and review of published literature. *J Med Genet.* 2017;54: 537–543.  
280 doi:10.1136/jmedgenet-2016-104360
- 281 12. Johannesen KM, Gardella E, Linnankivi T, Courage C, Martin A de Saint, Lehesjoki  
282 A-E, et al. Defining the phenotypic spectrum of SLC6A1 mutations. *Epilepsia.*  
283 2018;59: 389–402. doi:10.1111/epi.13986
- 284 13. Hu H, Haas S, Chelly J, Esch H Van, Raynaud M, Brouwer A de, et al. X-exome  
285 sequencing of 405 unresolved families identifies seven novel intellectual  
286 disability genes. *Mol Psychiatry.* 2015;21: 133–148. doi:10.1038/mp.2014.193
- 287 14. Mignot C, von Stulpnagel C, Nava C, Ville D, Sanlaville D, Lesca G, et al. Genetic  
288 and neurodevelopmental spectrum of SYNGAP1-associated intellectual disability  
289 and epilepsy. *J Med Genet.* 2016;53: 511–522. doi:10.1136/jmedgenet-2015-  
290 103451
- 291 15. Laskowski RA, Thornton JM, Tyagi N, Johnson D, McWilliam C, Kinning E, et al.  
292 Integrating population variation and protein structural analysis to improve  
293 clinical interpretation of missense variation: application to the WD40 domain.  
294 *Hum Mol Genet.* 2016;25: 927–935. doi:10.1093/hmg/ddv625
- 295 16. Zarate YA, Smith-Hicks CL, Greene C, Abbott MA, Siu VM, Calhoun ARUL, et al.  
296 Natural history and genotype-phenotype correlations in 72 individuals with  
297 SATB2-associated syndrome. *Am J Med Genet Part A.* 2018;176: 925–935.  
298 doi:10.1002/ajmg.a.38630
- 299 17. Sands TT, Miceli F, Lesca G, Beck AE, Sadleir LG, Arrington DK, et al. Autism and  
300 developmental disability caused by KCNQ3 gain-of-function variants. *Ann*

- 301           Neurol. 2019. doi:10.1002/ana.25522
- 302    18.   Hormozdiari F, Penn O, Borenstein E, Eichler EE. The discovery of integrated  
303           gene networks for autism and related disorders. *Genome Res.* 2015;25: 142–  
304           154. doi:10.1101/gr.178855.114
- 305    19.   Kochinke K, Zweier C, Nijhof B, Fenckova M, Cizek P, Honti F, et al. Systematic  
306           Phenomics Analysis Deconvolutes Genes Mutated in Intellectual Disability into  
307           Biologically Coherent Modules. *Am J Hum Genet.* 2016;98: 149–164.  
308           doi:10.1016/j.ajhg.2015.11.024
- 309    20.   Kopanos C, Tsiolkas V, Kouris A, Chapple CE, Aguilera MA, Meyer R, et al.  
310           VarSome: the human genomic variant search engine. *Bioinformatics.* 2018; 1–3.  
311           doi:10.1093/bioinformatics/bty897
- 312    21.   Lykke-Andersen S, Jensen TH. Nonsense-mediated mRNA decay: an intricate  
313           machinery that shapes transcriptomes. *Nat Rev Mol Cell Biol.* 2015;16: 665–677.  
314           doi:10.1038/nrm4063
- 315    22.   Clark MM, Stark Z, Farnaes L, Tan TY, White SM, Dimmock D, et al. Meta-analysis  
316           of the diagnostic and clinical utility of genome and exome sequencing and  
317           chromosomal microarray in children with suspected genetic diseases. *npj*  
318           *Genomic Med.* 2018;3: 1–10. doi:10.1038/s41525-018-0053-8
- 319    23.   Wang G, Zhang J, Moskophidis D, Mivechi NF. Targeted disruption of the heat  
320           shock transcription factor (hsf)-2 gene results in increased embryonic lethality,  
321           neuronal defects, and reduced spermatogenesis. *Genesis.* 2003;36: 48–61.  
322           doi:10.1002/gene.10200
- 323    24.   Kallio M, Chang Y, Manuel M, Alastalo T-P, Rallu M, Gitton Y, et al. Brain  
324           abnormalities, defective meiotic chromosome synapsis and female subfertility in

- 325 HSF2 null mice. EMBO J. 2002;21: 2591–2601. doi:10.1093/emboj/21.11.2591
- 326 25. McRae J, Clayton S, Fitzgerald T, Kaplanis J, Prigmore E, Rajan D, et al.
- 327 Prevalence and architecture of de novo mutations in developmental disorders.
- 328 Nature. 2017;542: 433–438. doi:10.1038/nature21062
- 329 26. Parker MJ, Magee AC, Maystadt I, Benoit V, study D, FitzPatrick DR, et al. De
- 330 novo, heterozygous, loss-of-function mutations in SYNGAP1 cause a syndromic
- 331 form of intellectual disability . Am J Med Genet Part A. 2015;167: 2231–2237.
- 332 doi:10.1002/ajmg.a.37189

333

## 334 **Supporting information**

335 **S1 Fig. Functional and enrichment network analysis of protein-protein interactions of**

336 **the candidate genes identified in our cohort, the known AS-like genes and *UBE3A*,**

337 **using STRING. A)** The figure shows the interaction pattern between the different genes;

338 circumferences and edges represent the genes and their interactions, respectively.

339 Edges are colored according to whether there is a known interaction, a predicted

340 interaction or others. **B)** The table shows the GO terms significantly represented

341 amongst the candidate genes. The analysis is repeated for the three GO domains:

342 Biological Process, Molecular Function and Cellular Component. Overall, we see that the

343 significant terms refer to different aspects of the nervous system, from development to

344 synapses.

345

346 **S2 Fig. Quantification of *HSF2* mRNA transcripts suggest that variant**

347 **c.456\_459delTGAG is sensitive to NMD. A)** qPCR analysis of *HSF2* gene expression in



348 patient 13 and a control sample normalized to GAPDH shows less *HSF2* expression in  
349 patient 13 (\* p-value 0.014). **B)** Sanger sequencing of a fragment encompassing variant  
350 c.456\_459delTGAG from patient 12 and a control sample shows a reduction in the  
351 percentage of the allele with the variant in the cDNA compared to DNA.  
352  
353  
354

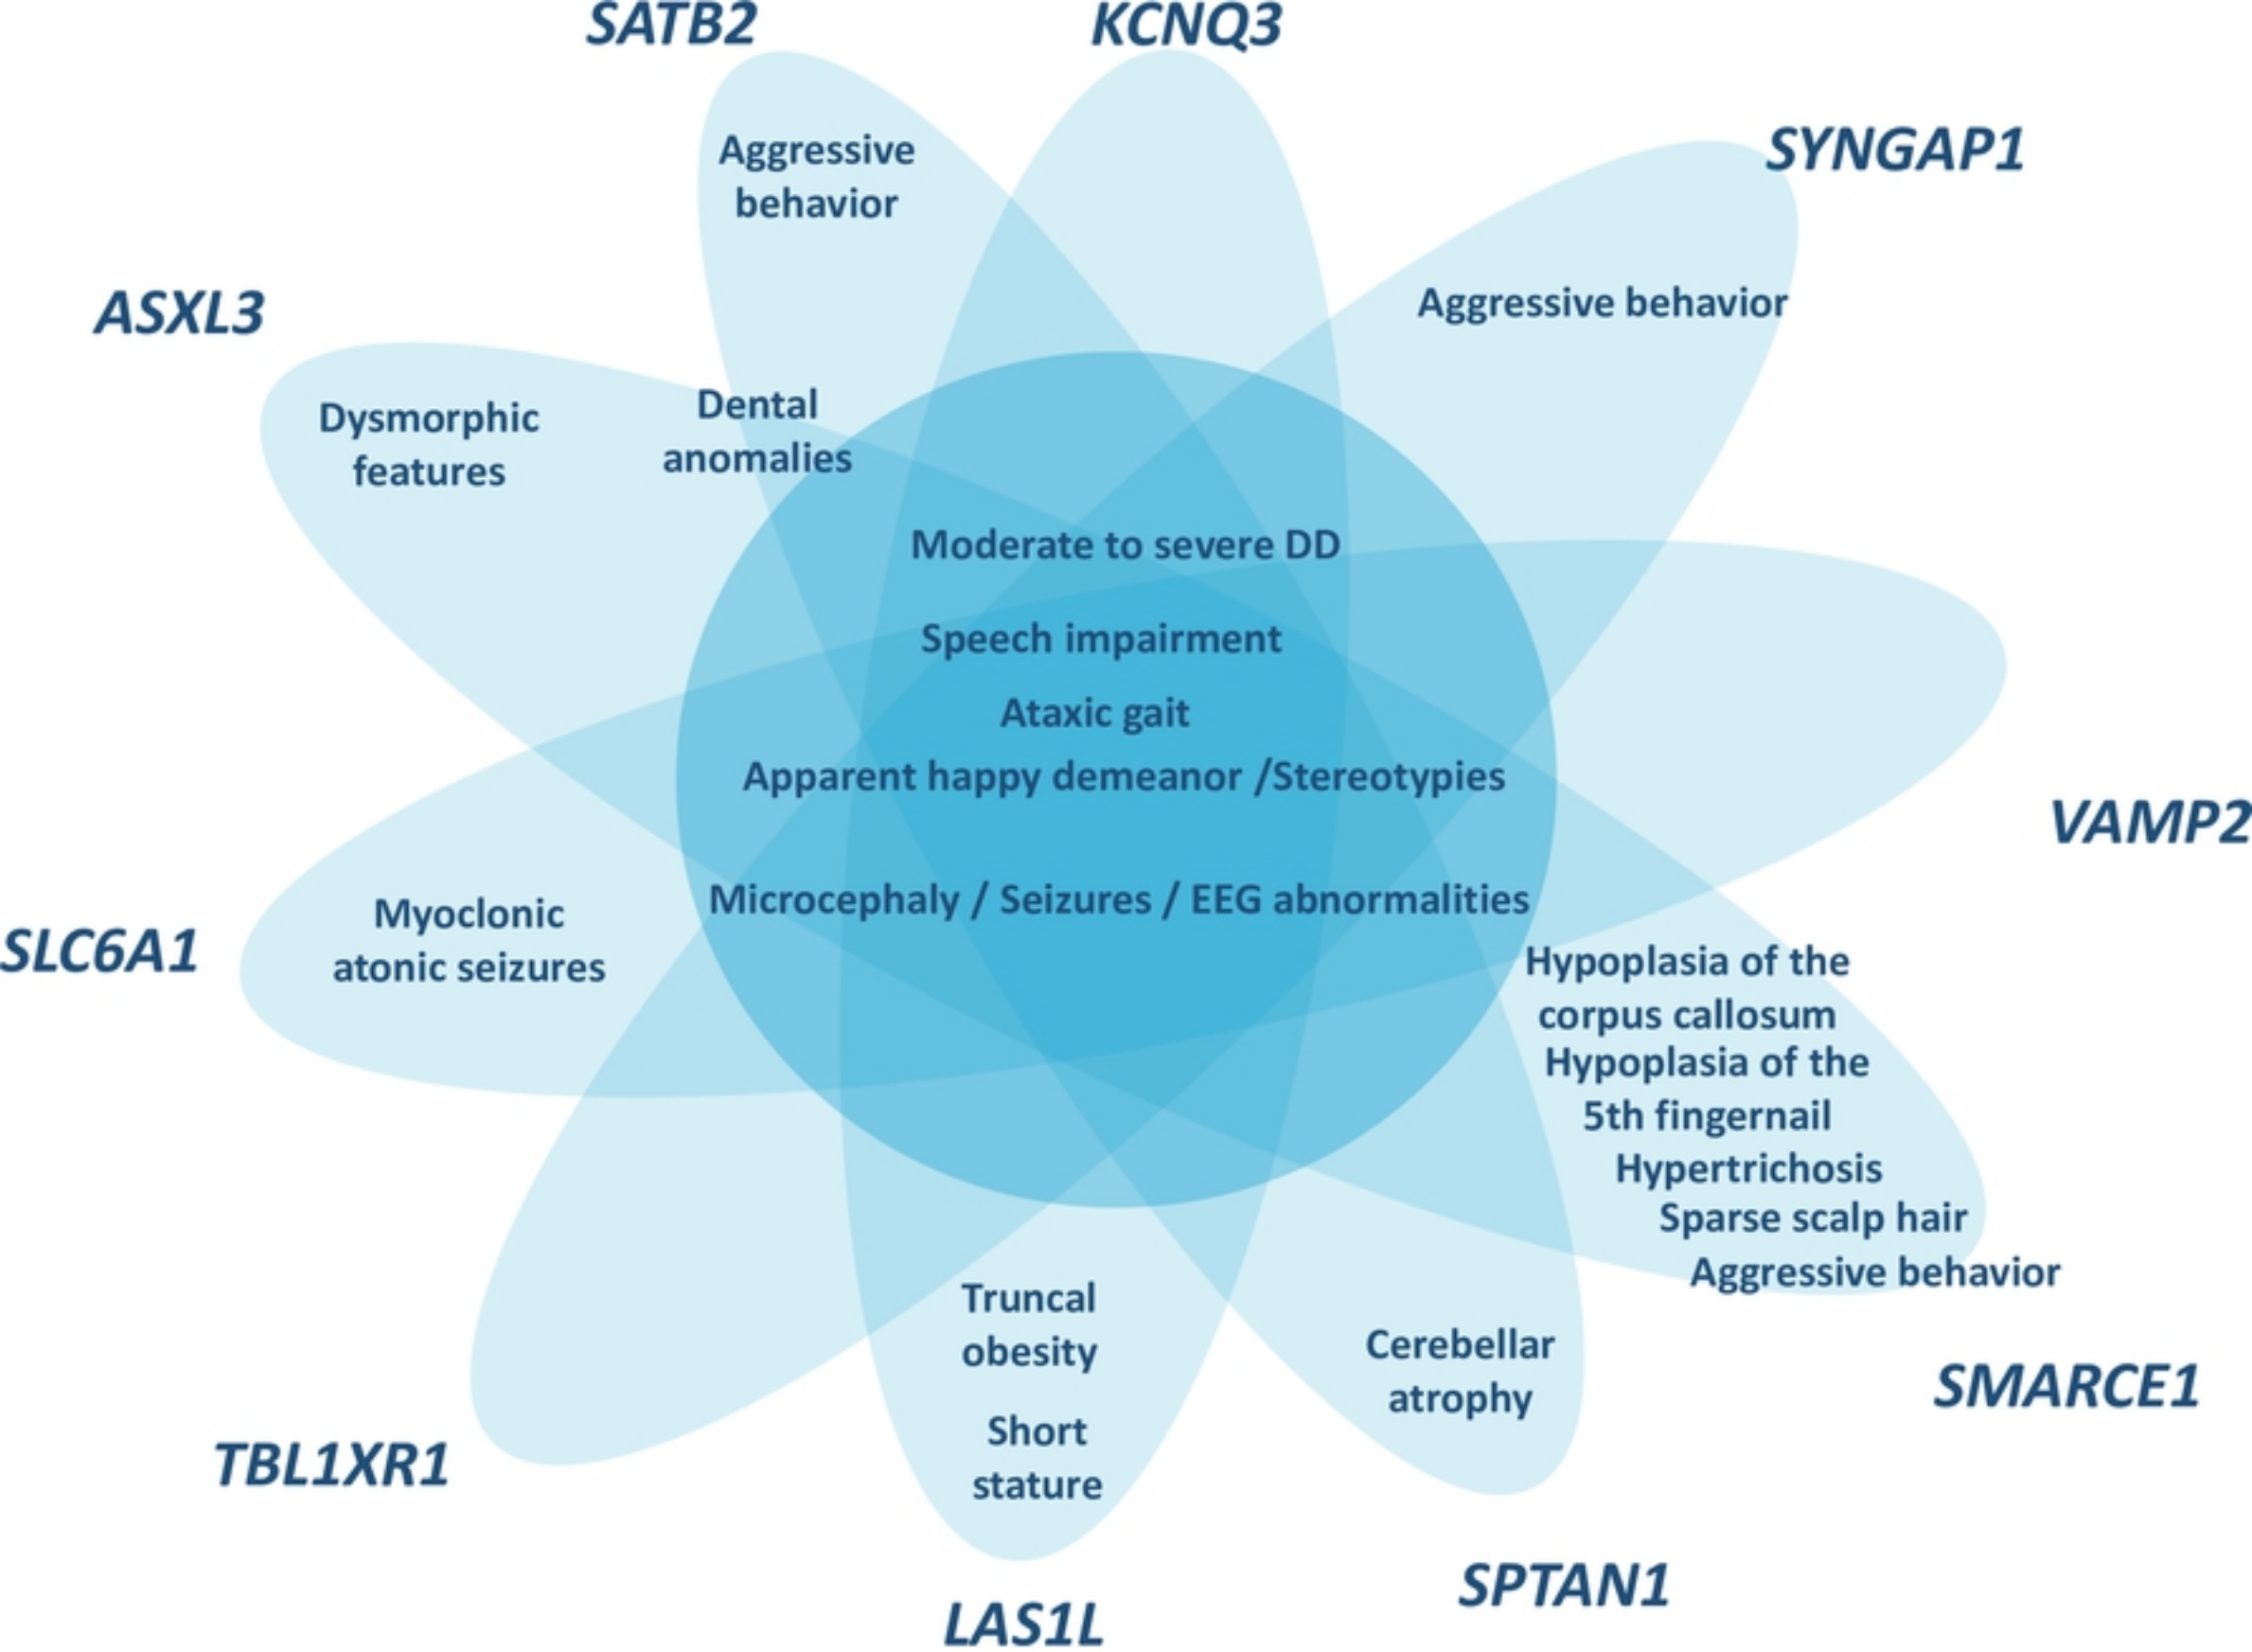

Fig 1
